# Supplementary material
Source: ML conference proceedings conference paper supplement (https://openaccess.thecvf.com/content/CVPR2026/html/Zhao_OmniZip_Learning_a_CVPR_2026_paper.html)
Supplement: Supplementary file 1 [file Zhao_OmniZip_Learning_a_CVPR_2026_supplemental.pdf]

# OmniZip: Learning a Unified and Lightweight Lossless Compressor for Multi-Modal Data

## Supplementary Material

The supplementary material includes deeper explanations of the proposed method and extended experiments, covering: (1) detailed descriptions of the modality-unified tokenization, modality-routing context learning, modality-routing feedforward design, and reparameterization training strategy; (2) implementation details of multi-modal datasets and training/testing process; (3) extended lossless compression performance using adjusted bits/Byte as the metric.

### 1. Backbone Selection

We compare three common backbone architectures for the probability prediction model: Transformer [28], Mamba [16], and RWKV [23]. These models are evaluated in terms of compression efficiency (bits/Byte), computational cost (MACs), and inference speed (KB/s).

As for Transformer, We use a causal, decoder-only Transformer implemented in JAX/Haiku. Input tokens are embedded, scaled, and summed with sinusoidal positional encodings, then processed through a stack of eight multi-head self-attention (8 heads) and feed-forward layers, each followed by residual connections and LayerNorm. For Mamba and RWKV, we adopt their official implementations<sup>12</sup>. The trained models are converted into CoreML packages and benchmarked on a MacBook Pro 2024 with an Apple M4 chip using CPU inference.

### 2. Modality-Unified Tokenization

To enable multi-modal lossless compression, we design a reversible modality-unified tokenization strategy that maps heterogeneous data into a shared token space. The main challenge arises from the fundamentally distinct structures of different modalities. Moreover, to ensure lossless reconstruction, the tokenization process must be fully invertible.

For text-like data, including natural language, gene sequences, and databases, we follow [32] and adopt a SentencePiece BPE tokenizer [27] with a vocabulary size of 16K. To better adapt to domain-specific characteristics, we extend the vocabulary with symbolic tokens: like nucleotide bases (A, T, G, C) for gene sequences, and common SQL keywords (e.g., SELECT, FROM, WHERE) for databases. Formally, given a text string  $S$ , the tokenizer performs:

$$S_{\text{text}} \xrightarrow{\text{SPM BPE}} [x_1, x_2, \dots, x_n], \quad x_i \in \mathcal{V}_{\text{text}}, |\mathcal{V}_{\text{text}}| = 16\text{K}. \quad (1)$$

For image-like data, including natural, medical, and tactile images, we partition each image into  $16 \times 16 \times 3$  patches to preserve local spatial correlations. Pixels within each patch are flattened in raster-scan order, and each RGB channel is expanded sequentially:  $[R_1, G_1, B_1, R_2, G_2, B_2, \dots]$ . We treat each 8-bit sub-pixel as an independent token (i.e.,  $|\mathcal{V}_{\text{image}}| = 256$ ), thereby maintaining inter-pixel and inter-channel correlations. For grayscale medical images, each 8-bit intensity value is directly mapped to a single token. Tactile data are handled in two ways: visual tactile maps are processed as regular RGB images, while 3D tactile force vectors  $(x, y, z)$  are linearly mapped into pseudo-RGB triplets for tokenization.

Speech is continuous and hard to discretize without loss. Hence, we adopt a next-byte prediction scheme, reading the raw byte stream and treating each byte as a token:

$$S_{\text{speech}}(t) \xrightarrow{\text{each byte}} [x_1, x_2, \dots, x_n], \quad x_i \in [0, 255], \quad (2)$$

yielding a 256-size vocabulary shared with image-like modalities (i.e.,  $|\mathcal{V}_{\text{speech}}| = 256$ ).

After tokenization, we merge all modality vocabularies into a single unified token space:

$$\mathcal{V}_{\text{uni}} = \mathcal{V}_{\text{text}} \cup \mathcal{V}_{\text{image}} \cup \mathcal{V}_{\text{speech}}. \quad (3)$$

Each sequence is prefixed with a modality identifier token, i.e.,  $\langle \text{image} \rangle$ ,  $\langle \text{medical} \rangle$ ,  $\langle \text{tactile} \rangle$ ,  $\langle \text{text} \rangle$ ,  $\langle \text{gene} \rangle$ ,  $\langle \text{database} \rangle$ , or  $\langle \text{speech} \rangle$ , allowing the model to learn modality-aware priors during probability estimation.

Before softmax and arithmetic coding, we apply modality-specific masking to restrict the active token probabilities and improve the compression efficiency. For example, during image compression, only tokens in  $\mathcal{V}_{\text{image}}$  are retained, and all others are zeroed out:

$$p_{\text{image}}(x_i | x_{<i}) = \text{softmax}(o(x_i | x_{<i}) \odot M_{\text{image}}), \quad (4)$$

where  $M_{\text{image}}$  is a binary mask selecting image tokens,  $o(x_i | x_{<i})$  is the output logit before softmax.

### 3. Modality-Routing Context Learning

As shown in Fig. 1, each RWKV block [23] consists of two components: a Time Mixing module and a multilayer perceptron (MLP) [26]. The Time Mixing module serves as a lightweight alternative to attention, modeling contextual dependencies through a recurrent formulation. Instead of computing pairwise attention, it maintains a running state that summarizes past tokens, allowing linear-time inference.

<sup>1</sup>Mamba: <https://github.com/state-spaces/mamba>.

<sup>2</sup>RWKV: <https://github.com/BlinkDL/RWKV-LM>.

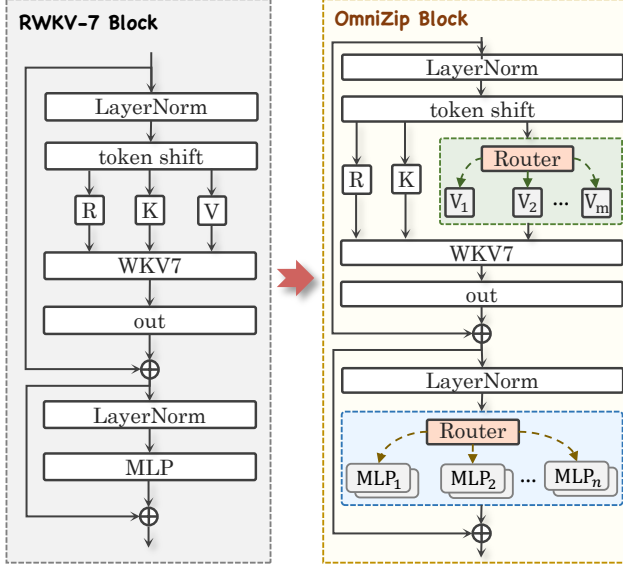

Figure 1. Key structural differences between RWKV-7 and OmniZip model. Left: an RWKV-7 block. Right: an OmniZip block.

As stated, different modalities exhibit distinct contextual dependencies. For instance, text are one-dimensional sequential and have mostly short-range semantic dependencies. Images are two-dimensional and flattened into sequences, with inter-pixel and inter-channel correlations. Speech is continuous and temporally structured.

To enhance multi-modal adaptability, we integrate a mixture-of-experts (MoE) mechanism [6] into the Time Mixing module. MoE dynamically selects specialized experts based on input tokens, enabling conditional computation and reducing unnecessary activation. Specifically, given an input token  $x_i$ , a router network predicts a score:

$$g_{i,e} = \text{softmax}(x_i \cdot W_g)_e = \frac{\exp(x_i \cdot W_{g,e})}{\sum_{e'=1}^E \exp(x_i \cdot W_{g,e'})}, \quad (5)$$

where  $E$  is the expert count,  $W_g$  is the routing projection.  $g_{i,e}$  means the likelihood that expert  $e$  should process  $x_i$ .

To keep efficiency, we adopt top- $k$  sparse routing, where only the experts with top- $k$  highest scores are activated, and their outputs are aggregated as a weighted sum. We experiment with applying MoE to different components and find that the V layer benefits most from such adaptive routing. Conceptually, the K layer serves as a semantic index, and the R layer acts as a temporal gate, while the V layer encodes concrete contextual content. Allowing diversity in V layer enables the model to adapt more flexibly to modality-specific information. Hence, we apply MoE only to the V layer, sharing K and R layers across all V experts. Formally,

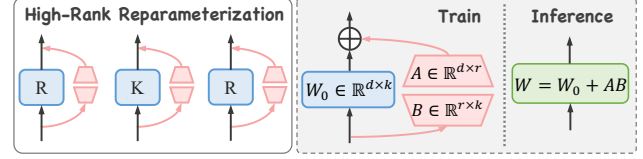

Figure 2. Illustration of the reparameterization training strategy.

the V-projection output in our MoE design is computed as:

$$V(x_i) = \sum_{e \in \text{top-}k} \hat{g}_{i,e} e(x_i), \quad (6)$$

where each expert  $e$  is a distinct V projection layer, and  $\hat{g}_{i,e}$  denotes the re-normalized routing score.

To ensure model compactness, we use  $E = 4$  experts and  $k = 2$ . This setup increases the number of parameters by only three additional V layers per Time Mixing module, yet notably improves the multi-modal adaptability.

#### 4. Modality-Routing Feedforward

In the RWKV backbone [23], each block integrates a feedforward MLP that projects intermediate representations into a higher-dimensional space, applies nonlinear transformations, and fuses contextual information from the Time Mixing module. This structure enhances model expressiveness but treats all tokens uniformly, regardless of their modality. In fact, a single shared MLP is insufficient to capture the distinct properties of heterogeneous modalities.

To better support multi-modal compression, we replace this MLP with a modality-routing feedforward module based on MoE. The routing mechanism follows the design in Sec. 3, while the experts here are small MLPs instead of V layers. Each MLP expert adopts a hidden factor of  $2\times$ , half that of the original large MLP. With four experts and top- $k = 2$ , the number of activated parameters per token remains nearly identical to the original design.

#### 5. Reparameterization Training Strategy

Following [32], we adopt a high-rank reparameterization training strategy to enhance OmniZip’s compression capacity without increasing inference complexity. During training, each R, K, and V projection layer in the Time Mixing module is augmented with an auxiliary high-rank branch to improve representational power. At inference, these auxiliary branches are merged back into the main path through structural reparameterization, maintaining a compact single-path design, as illustrated in Fig. 2.

Specifically, instead of using parallel branches like  $1 \times 1$  convolutions or shortcuts as in [14], we follow the strategy in [32] and reparameterize each branch as a product of two high-rank matrices:  $A \in \mathbb{R}^{d \times r}$  and  $B \in \mathbb{R}^{r \times k}$ , where the

Table 1. Details of the utilized multi-modal datasets (16 datasets from 7 modalities).

| Dataset           | Type     | Train | Test | Description                                                                                                      |
|-------------------|----------|-------|------|------------------------------------------------------------------------------------------------------------------|
| Kodak [12]        | image    | ✗     | ✓    | 24 film-scanned photos (768 × 512) with balanced natural and synthetic scenes. We use it for testing.            |
| CLIC-P [9]        | image    | ✗     | ✓    | 41 high-resolution DSLR images (mostly 2K) with rich color and texture diversity. We use it for testing.         |
| CLIC-M [9]        | image    | ✗     | ✓    | 61 smartphone photos (mostly 2K) containing real-world noise and artifacts. We use it for testing.               |
| DIV2K [1]         | image    | ✓     | ✓    | 900 2K-resolution images with a large diversity of contents. We follow the official split (800 train, 100 test). |
| Axial [5]         | medical  | ✓     | ✓    | 2D knee MRI slices (256 × 256) in the axial plane. We follow the official split (~38K train, ~4.1K test).        |
| Coronal [5]       | medical  | ✓     | ✓    | 2D knee MRI slices (256 × 256) in the coronal plane. We follow the official split (~33K train, ~3.5K test).      |
| Sagittal [5]      | medical  | ✓     | ✓    | 2D knee MRI slices (256 × 256) in the sagittal plane. We follow the official split (~34K train, ~3.6K test).     |
| TouchandGo [30]   | tactile  | ✓     | ✓    | A tactile dataset of 140 trajectories (640 × 480), with 60% for training and the rest for testing.               |
| ObjectFolder [15] | tactile  | ✓     | ✓    | A tactile dataset of 1000 trajectories (120 × 160), with 60% for training and the rest for testing.              |
| enwik8 [10]       | text     | ✓     | ✗    | The first 100MB of the English Wikipedia dump. We use it for testing.                                            |
| enwik9 [11]       | text     | ✗     | ✓    | The first 1GB of the English Wikipedia dump. We use it for testing.                                              |
| Gutenberg [25]    | text     | ✓     | ✓    | A library containing 75K eBooks. We randomly select 2K and 1K books for training and testing, respectively.      |
| GenoSeq [8]       | gene     | ✓     | ✓    | 17 genomics sequencing dataset with FastQ format. We use 10 for training and 7 for testing.                      |
| DNACorpus [24]    | gene     | ✓     | ✓    | DNA sequences of 15 species, we follow the official split (370MB for training and 246MB for testing).            |
| Spider [31]       | database | ✓     | ✓    | 5693 SQL queries on 200 databases. We follow the official split (314MB for training and 60MB for testing).       |
| WikiSQL [17]      | database | ✓     | ✓    | 24241 SQL queries from Wikipedia. We follow the official split (38MB for training and 12MB for testing).         |
| LibriSpeech [22]  | speech   | ✓     | ✓    | A 1000-hour English speech dataset. We follow the official split (1GB for training and 600MB for testing).       |

148 main-path’s weight is  $W_0 \in \mathbb{R}^{d \times k}$  and  $r \gg d, k$ . During  
 149 training, the layer’s output is the sum of the main branch  
 150 and the bypass branch. These branches are merged at infer-  
 151 ence via structural reparameterization:  $W = W_0 + A \times B$ ,  
 152 resulting in a single-path structure that reduces both runtime  
 153 and memory usage. Importantly, although the branches are  
 154 merged during inference, the learned multi-branch param-  
 155 eters are preserved, maintaining high capability.

156 In OmniZip, this strategy is applied to all the R/K/V lay-  
 157 ers in the Time Mixing module. Following [32], we set the  
 158 decomposition rank  $r$  to  $4 \times$  the embedding dimension.

## 159 6. Multi-Modal Datasets

160 We conduct experiments across seven data types, including  
 161 natural images, medical images, tactile signals, text, gene  
 162 sequences, databases, and speech, covering a total of 16  
 163 datasets for training and evaluation, as shown in Tab. 1.

164 To ensure balanced and stable multi-modal training, we  
 165 normalize the data scale across modalities by restricting  
 166 each modality’s training set to approximately 1 GB. For  
 167 large datasets, samples are randomly drawn to maintain  
 168 representative coverage of content diversity, while smaller  
 169 datasets are augmented through simple transformations  
 170 such as random cropping/flipping, token shuffling, or noise  
 171 perturbation (depending on the modality type).

172 During training, we also adopt a balanced batch sam-  
 173 pling strategy to prevent overfitting toward some modal-  
 174 ities. Specifically, the dataloader cycles through all modal-  
 175 ities in a round-robin manner, dynamically constructing each  
 176 batch by uniformly sampling from the shuffled indices of  
 177 every modality. This ensures that each batch contributes an  
 178 equal number of samples per modality, allowing the model

to learn modality-invariant patterns.

Regarding the model input format, as stated in Sec. 2,  
 for image-like data, each input corresponds to a flattened  
 $16 \times 16 \times 3$  patch, resulting in a sequence length of 768 to-  
 kens. Text-like and speech data are processed as sequential  
 streams, with each input sequence containing 1024 tokens.

## 7. Training and Testing Process

To accelerate the overall pipeline, we incorporate optimiza-  
 tions like Cython [3], Numba [19], and distributed paral-  
 lelization. For model evaluation and deployment, we test  
 OmniZip across three hardware platforms: (1) NVIDIA  
 A100 GPU (for training and high-throughput testing), (2)  
 MacBook Pro 2024 (Apple M4 CPU), and (3) iPhone 17  
 Pro (A19 NPU). For CPU and NPU evaluation, we convert  
 the trained PyTorch models into CoreML packages [18] and  
 conduct profiling via Xcode Instruments. For GPU evalua-  
 tion, we switch the GPU to performance mode and ensure  
 no other processes are running on the device. We then mea-  
 sure inference latency by executing the model 1000 times  
 consecutively and report the average runtime.

## 8. Adjusted Multi-Modal Compression Results

To provide a more realistic evaluation of deployment effi-  
 ciency, we adopt the adjusted bits-per-Byte metric, which  
 incorporates model size into the compressed data size. It  
 penalizes large models and reflects the trade-off between  
 compression performance and model storage overhead.

As shown in Tab. 2 and Tab. 3, OmniZip-S achieves  
 superior adjusted compression efficiency across all seven  
 modalities, including image-like, text-like, and speech

Table 2. Adjusted compression performance (bits/Byte) on image-like (natural image, medical image, and tactile) datasets. \* denotes pretrained LLMs, † indicates that some results are reproduced by us. Other values are taken from their papers.

| Compressor    | #Params↓ | Multi Modal | Adjusted bits/Byte↓ |        |        |        |            |              |        |         |          |
|---------------|----------|-------------|---------------------|--------|--------|--------|------------|--------------|--------|---------|----------|
|               |          |             | Kodak               | CLIC-P | CLIC-M | DIV2K  | TouchandGo | ObjectFolder | Axial  | Coronal | Sagittal |
| Llama3*† [13] | 8B       | ✓           | 8490321             | 971320 | 553618 | 291465 | 322642     | 214197       | 693352 | 750368  | 970961   |
| RWKV*† [13]   | 7B       | ✓           | 7429031             | 849906 | 484417 | 255032 | 282312     | 187423       | 606683 | 656573  | 823341   |
| DLPR*† [2]    | 22.3M    | ✗           | 23670               | 2710   | 1545   | 815    | 900        | 601          | -      | -       | -        |
| L3C*† [21]    | 5M       | ✗           | 5310                | 610    | 349    | 185    | 203        | 138          | 439    | 473     | 594      |
| P2LLM [7]     | 8B       | ✗           | 8490319             | 971318 | 553616 | 291463 | -          | -            | -      | -       | -        |
| aiWave [29]   | 695M     | ✗           | -                   | -      | -      | -      | -          | -            | 59372  | 64254   | 80574    |
| BCM [20]      | 12.5M    | ✗           | -                   | -      | -      | -      | -          | -            | 1088   | 1176    | 1475     |
| OmniZip-S     | 4.8M     | ✓           | 5097                | 586    | 335    | 178    | 195        | 132          | 421    | 454     | 570      |
| OmniZip-M     | 38M      | ✓           | 40332               | 4618   | 2632   | 1387   | 1534       | 1020         | 3298   | 3568    | 4475     |
| OmniZip-L     | 152M     | ✓           | 161319              | 18458  | 10521  | 5540   | 6131       | 4072         | 13178  | 14261   | 17883    |

Table 3. Adjusted compression performance (bits/Byte) on text-like (natural language, gene sequence, database) and speech datasets. \* denotes pretrained LLMs, † indicates that some results are reproduced by us. Other values are taken from their papers.

| Compressor    | #Params↓ | Multi Modal | Adjusted bits/Byte↓ |           |        |         |         |           |             |
|---------------|----------|-------------|---------------------|-----------|--------|---------|---------|-----------|-------------|
|               |          |             | enwik9              | Gutenberg | Spider | WikiSQL | GenoSeq | DNACorpus | LibriSpeech |
| Llama3*† [13] | 8B       | ✓           | 129                 | 362459    | 2125   | 10835   | 500     | 1138      | 212         |
| RWKV*† [13]   | 7B       | ✓           | 113                 | 317152    | 1859   | 9480    | 437     | 996       | 186         |
| tszip [4]     | 169      | ✗           | 4                   | 7658      | 46     | 230     | 13      | 26        | -           |
| L3TC [32]     | 12       | ✗           | 2                   | 546       | 6      | 18      | 3       | 4         | -           |
| OmniZip-S     | 4.8M     | ✓           | 1                   | 219       | 3      | 8       | 2       | 3         | 4           |
| OmniZip-M     | 38M      | ✓           | 2                   | 1723      | 11     | 52      | 4       | 7         | 5           |
| OmniZip-L     | 152M     | ✓           | 3                   | 6888      | 42     | 207     | 11      | 23        | 8           |

208 datasets. OmniZip-M and OmniZip-L also exhibit satisfac-  
 209 tory balance between compression efficiency and deploy-  
 210 ability. Among modality-specific compressors, Mentzer  
 211 et al. [21] and Zhang et al. [32] achieve competitive adjusted  
 212 compression efficiency on image-like and text-like datasets,  
 213 respectively. Though [13] demonstrate strong compression  
 214 efficiency on text-like and speech datasets, their massive pa-  
 215 rameter sizes dominate the total compression cost, resulting  
 216 in significantly higher adjusted bits-per-Byte values.

## 217 References

218 [1] Eirikur Agustsson and Radu Timofte. Ntire 2017 challenge  
 219 on single image super-resolution: Dataset and study. In *Pro-*  
 220 *ceedings of the IEEE conference on computer vision and pat-*  
 221 *tern recognition workshops*, pages 126–135, 2017. 3  
 222 [2] Yuanchao Bai, Xianming Liu, Kai Wang, Xiangyang Ji, Xi-  
 223 aolin Wu, and Wen Gao. Deep lossy plus residual coding for  
 224 lossless and near-lossless image compression. *IEEE Trans-*  
 225 *actions on Pattern Analysis and Machine Intelligence*, 46(5):  
 226 3577–3594, 2024. 4  
 227 [3] Stefan Behnel, Robert Bradshaw, Craig Citro, Lisandro Dal-  
 228 cin, Dag Sverre Seljebotn, and Kurt Smith. Cython: The best  
 229 of both worlds. *Computing in Science and Engineering*, 13  
 230 (2):31–39, 2011. 3  
 231 [4] Fabrice Bellard. ts\_zip: Text Compression using Large Lan-  
 232 guage Models. [https://bellard.org/ts\\_zip/](https://bellard.org/ts_zip/),  
 233 2023. Accessed: 2024-08-10. 4  
 234 [5] Nicholas Bien, Pranav Rajpurkar, Robyn L Ball, Jeremy

Irvin, Allison Park, Erik Jones, Michael Bereket, Bhavik N  
 Patel, Kristen W Yeom, Katie Shpanskaya, et al. Deep-  
 learning-assisted diagnosis for knee magnetic resonance  
 imaging: development and retrospective validation of mrnet.  
*PLoS medicine*, 15(11):e1002699, 2018. 3  
 [6] Weilin Cai, Juyong Jiang, Fan Wang, Jing Tang, Sunhun  
 Kim, and Jiayi Huang. A survey on mixture of experts. *arXiv*  
*preprint arXiv:2407.06204*, 2024. 2  
 [7] Kecheng Chen, Pingping Zhang, Hui Liu, Jie Liu, Yibing  
 Liu, Jiaxin Huang, Shiqi Wang, Hong Yan, and Haoliang  
 Li. Large language models for lossless image compres-  
 sion: Next-pixel prediction in language space is all you need.  
*arXiv preprint arXiv:2411.12448*, 2024. 4  
 [8] Clarivate Analytics. Geneseq™ database. <https://clarivate.com/intellectual-property/patent-intelligence/geneseq/>, 2024. Accessed:  
 October 2025. 3  
 [9] CLIC. CLIC: Workshop and challenge on learned image  
 compression. In *Proceedings of the IEEE/CVF Conference*  
*on Computer Vision and Pattern Recognition*, 2021. 3  
 [10] Wikipedia Community. enwik8: First 100m bytes of the  
 english wikipedia dump. <https://cs.fit.edu/~mmahoney/compression/enwik8.zip>, 2006. Pre-  
 processed version used for character-level language model-  
 ing benchmarks. 3  
 [11] Wikipedia Community. enwik9: Complete english wikipedia  
 dump (xml). <https://cs.fit.edu/~mmahoney/compression/enwik9.zip>, 2007. Full Wikipedia  
 XML dump preprocessed for large-scale language modeling.  
 3

- 265 [12] Eastman Kodak Company. Kodak lossless true color image  
266 suite. Internal Research Dataset, 1999. 24 uncompressed  
267 PNG images, 768x512 resolution. 3
- 268 [13] Gregoire Deletang, Anian Ruoss, Paul-Ambroise Duquenne,  
269 Elliot Catt, Tim Genewein, Christopher Mattern, Jordi Grau-  
270 Moya, Li Kevin Wenliang, Matthew Aitchison, Laurent  
271 Orseau, Marcus Hutter, and Joel Veness. Language model-  
272 ing is compression. In *The Twelfth International Conference*  
273 *on Learning Representations*, 2024. 4
- 274 [14] Xiaohan Ding, Xiangyu Zhang, Ningning Ma, Jungong Han,  
275 Guiguang Ding, and Jian Sun. Repvgg: Making vgg-style  
276 convnets great again. In *Proceedings of the IEEE/CVF con-*  
277 *ference on computer vision and pattern recognition*, pages  
278 13733–13742, 2021. 2
- 279 [15] Ruohan Gao, Yen-Yu Chang, Shivani Mall, Li Fei-Fei, and  
280 Jiajun Wu. Objectfolder: A dataset of objects with implicit  
281 visual, auditory, and tactile representations. *arXiv preprint*  
282 *arXiv:2109.07991*, 2021. 3
- 283 [16] Albert Gu and Tri Dao. Mamba: Linear-time sequence  
284 modeling with selective state spaces. *arXiv preprint*  
285 *arXiv:2312.00752*, 2023. 1
- 286 [17] Wonseok Hwang, Jinyeong Yim, Seunghyun Park, and  
287 Minjoon Seo. A comprehensive exploration on wikisql  
288 with table-aware word contextualization. *arXiv preprint*  
289 *arXiv:1902.01069*, 2019. 3
- 290 [18] Apple Inc. Core ml, 2023. Apple’s framework for integrating  
291 machine learning models into apps. 3
- 292 [19] Siu Kwan Lam, Antoine Pitrou, and Stanley Seibert. Numba:  
293 A llvm-based python jit compiler. In *Proceedings of the Sec-*  
294 *ond Workshop on the LLVM Compiler Infrastructure in HPC*,  
295 pages 1–6, 2015. 3
- 296 [20] Xiangrui Liu, Meng Wang, Shiqi Wang, and Sam Kwong.  
297 Bilateral context modeling for residual coding in lossless 3d  
298 medical image compression. *IEEE Transactions on Image*  
299 *Processing*, 33:2502–2513, 2024. 4
- 300 [21] Fabian Mentzer, Eirikur Agustsson, Michael Tschannen,  
301 Radu Timofte, and Luc Van Gool. Practical full resolu-  
302 tion learned lossless image compression. In *Proceedings of*  
303 *the IEEE/CVF Conference on Computer Vision and Pattern*  
304 *Recognition (CVPR)*, pages 10629–10638, 2019. 4
- 305 [22] Vassil Panayotov, Guoguo Chen, Daniel Povey, and Sanjeev  
306 Khudanpur. Librispeech: an asr corpus based on public do-  
307 main audio books. In *2015 IEEE international conference*  
308 *on acoustics, speech and signal processing (ICASSP)*, pages  
309 5206–5210. IEEE, 2015. 3
- 310 [23] Bo Peng, Ruichong Zhang, Daniel Goldstein, Eric Al-  
311 caide, Haowen Hou, Janna Lu, William Merrill, Guangyu  
312 Song, Kaifeng Tan, Saiteja Utpala, et al. Rwkv-7” goose”  
313 with expressive dynamic state evolution. *arXiv preprint*  
314 *arXiv:2503.14456*, 2025. 1, 2
- 315 [24] Diogo Pratas and Armando J Pinho. A dna sequence corpus  
316 for compression benchmark. In *International Conference on*  
317 *Practical Applications of Computational Biology & Bioin-*  
318 *formatics*, pages 208–215. Springer, 2018. 3
- 319 [25] Project Gutenberg. Project gutenberg corpus. 2013. Avail-  
320 able at: <https://www.gutenberg.org/>. 3
- [26] Hassan Ramchoun, Youssef Ghanou, Mohamed Ettaouil,  
and Mohammed Amine Janati Idrissi. Multilayer perceptron:  
Architecture optimization and training. 2016. 1
- [27] Rico Sennrich, Barry Haddow, and Alexandra Birch. Neural  
machine translation of rare words with subword units, 2016.  
Accessed: 2024-08-10. 1
- [28] Ashish Vaswani, Noam Shazeer, Niki Parmar, Jakob Uszko-  
reit, Llion Jones, Aidan N. Gomez, Lukasz Kaiser, and Il-  
lia Polosukhin. Attention is all you need, 2017. Accessed:  
2024-08-10. 1
- [29] Dongmei Xue, Haichuan Ma, Li Li, Dong Liu, and Zhiwei  
Xiong. Aiwave: Volumetric image compression with 3-d  
trained affine wavelet-like transform. *IEEE Transactions on*  
*Medical Imaging*, 42(3):606–618, 2022. 4
- [30] Fengyu Yang, Chenyang Ma, Jiacheng Zhang, Jing Zhu,  
Wenzhen Yuan, and Andrew Owens. Touch and go: Learn-  
ing from human-collected vision and touch. *arXiv preprint*  
*arXiv:2211.12498*, 2022. 3
- [31] Tao Yu, Rui Zhang, Kai Yang, Michihiro Yasunaga, Dongxu  
Wang, Zifan Li, James Ma, Irene Li, Qingning Yao, Shanelle  
Roman, et al. Spider: A large-scale human-labeled dataset  
for complex and cross-domain semantic parsing and text-to-  
sql task. *arXiv preprint arXiv:1809.08887*, 2018. 3
- [32] Junxuan Zhang, Zhengxue Cheng, Yan Zhao, Shihao Wang,  
Dajiang Zhou, Guo Lu, and Li Song. L3tc: Leveraging  
rwkv for learned lossless low-complexity text compression.  
In *Proceedings of the AAAI Conference on Artificial Intelli-*  
*gence*, pages 13251–13259, 2025. 1, 2, 3, 4
